# Supplementary material
Source: PubMed Central journal article supplement (PMC5193163)
Supplement: NIHMS797271-supplement-Supplementary-data.pdf [file NIHMS797271-supplement-Supplementary-data.pdf]

## Supplementary Figure 1.

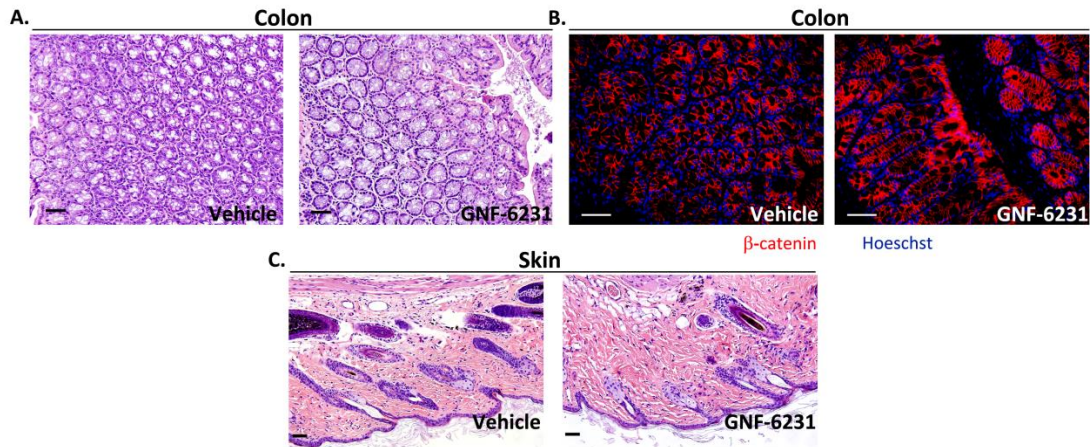

**Supplementary Figure 1: GNF-6231 causes no detectable toxicity in Wnt-dependent tissues.** Representative (A) H&E stained sections, and (B)  $\beta$ -catenin immunostained sections of the colon depicted that GNF-6231 treatment had no effect on colon morphology and  $\beta$ -catenin protein level and localization in the tissue. (C) Representative H&E stained sections of skin from GNF-6231 or vehicle-treated animals. Scale bars in A and B equal 50  $\mu$ m. Images are representative of at least 4 sections from  $N \geq 3$  mice.

## Supplementary Figure 2.

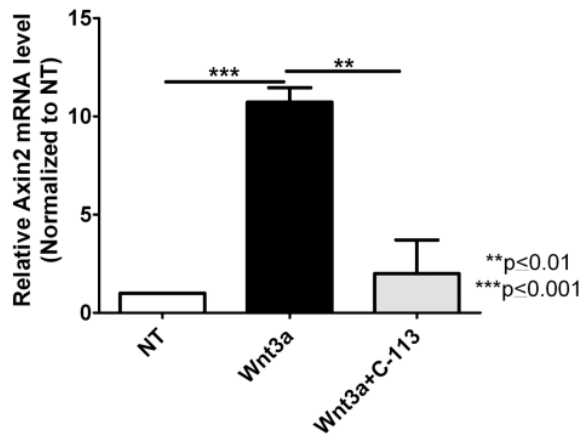

**Supplementary Figure 2: C-113 inhibits Wnt target gene expression.** Graph showing relative Axin2 mRNA expression detected by qRT-PCR in  $Sca1^+$  progenitors treated with recombinant WNT3A or with recombinant WNT3A and Wnt inhibitor C-113. Bars represent mean $\pm$ SD.  $N=3$  replicates from independent experiments;  $**P\leq 0.01$  and  $***P\leq 0.001$ ; Kruskal-Wallis test with Dunns correction for multiple comparisons.

### Supplementary Figure 3.

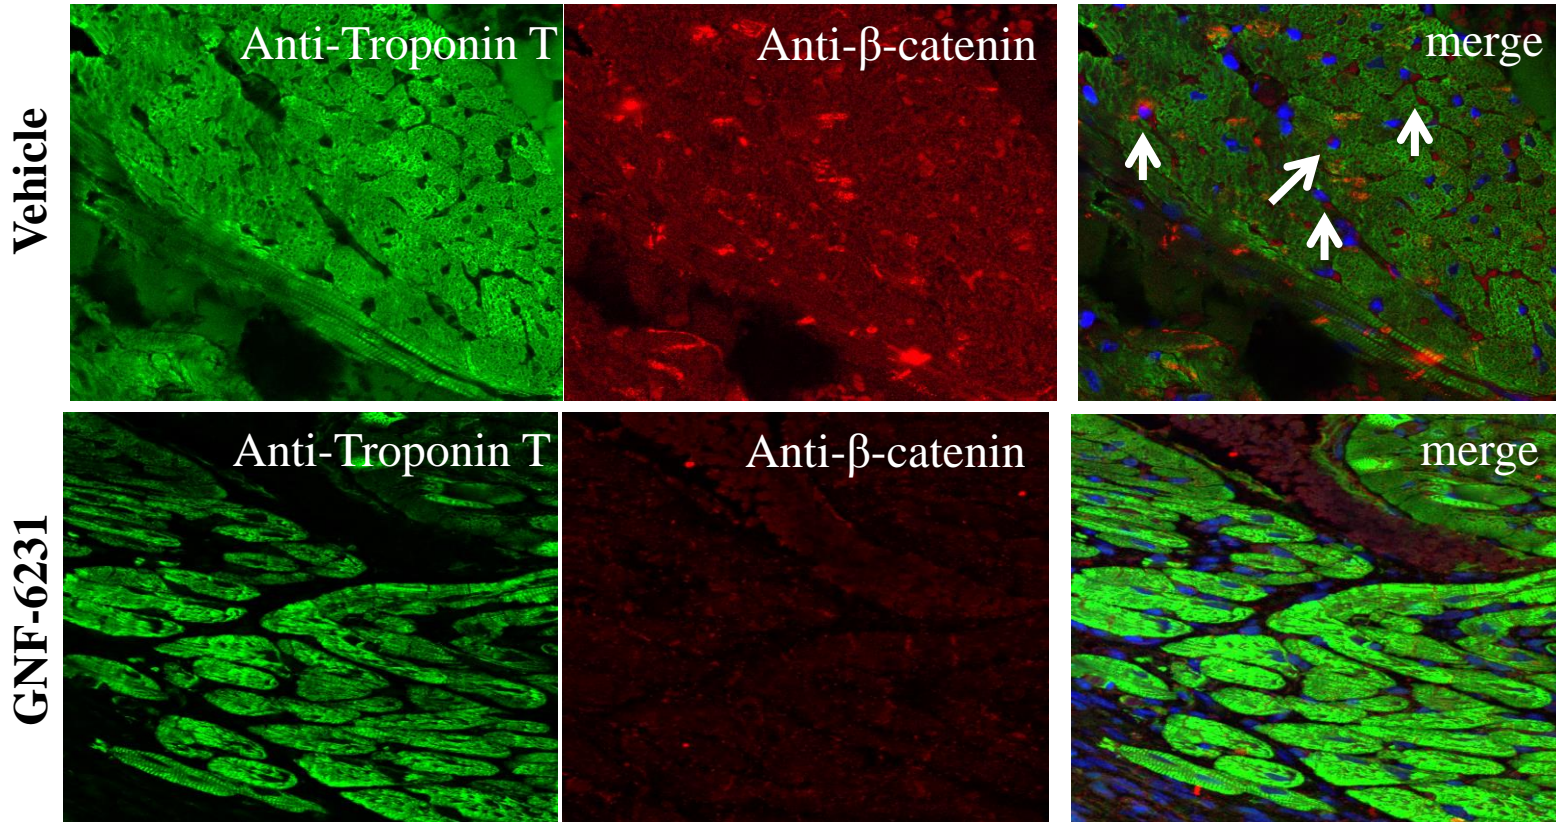

### Supplementary Figure 3: GNF-6231 causes reduction in Wnt activation in cardiomyocytes.

Representative figures showing paraffin sections from mouse hearts 7 days after MI treated with GNF-6231 (bottom panel) vs. vehicle (top panel) dual stained with anti troponin T to mark cardiomyocytes (green), anti-β-catenin (red), and DAPI (blue) to identify nuclei. Post MI, myocytes exhibit increased nuclear (active) β-catenin. Treatment with GNF-6231 virtually eliminates nuclear β-catenin in cardiomyocytes.

## Supplementary Figure 4.

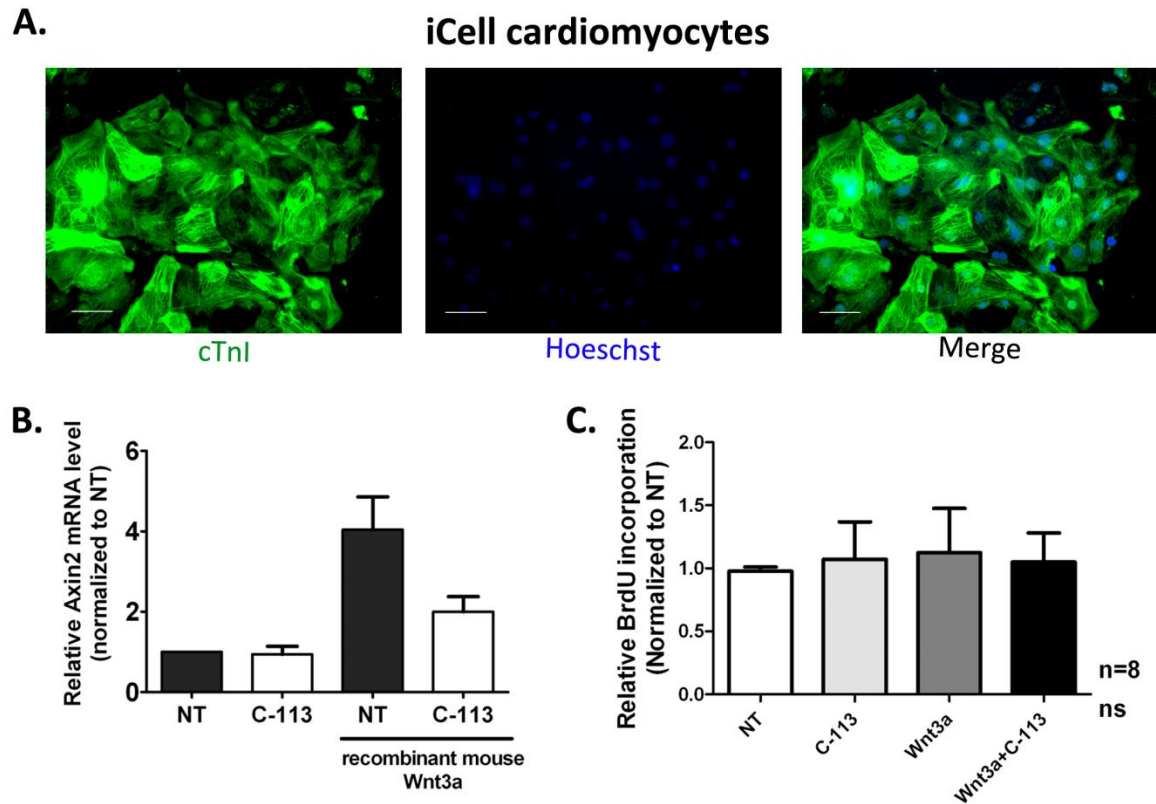

**Supplementary Figure 4: iCell cardiomyocytes express the cardiomyocyte marker cTnI, and Wnt pathway modulation does not affect proliferation of HL-1 cardiomyocytes.** (A) Representative images of iCell<sup>2</sup> Cardiomyocytes immunostained with the cardiomyocyte marker, cTnI (green). Sections were counterstained with Hoechst (blue). Scale bars equal 50 $\mu$ m. Images are representative of at least 4 sections from  $N=3$  replicate cell lines. (B) Relative Axin2 mRNA expression in HL-1 mouse cardiomyocytes treated with recombinant mouse Wnt3a and/or C-113. Bars represent mean $\pm$ SD;  $N=3$  replicates from independent experiments. (C) Relative proliferation measured by BrdU incorporation by HL-1 cardiomyocytes treated with recombinant Wnt3a or Wnt3a and C-113, showing that Wnt pathway modulation did not affect their proliferation.  $N=8$  replicates from independent experiments.

## Supplementary Figure 5.

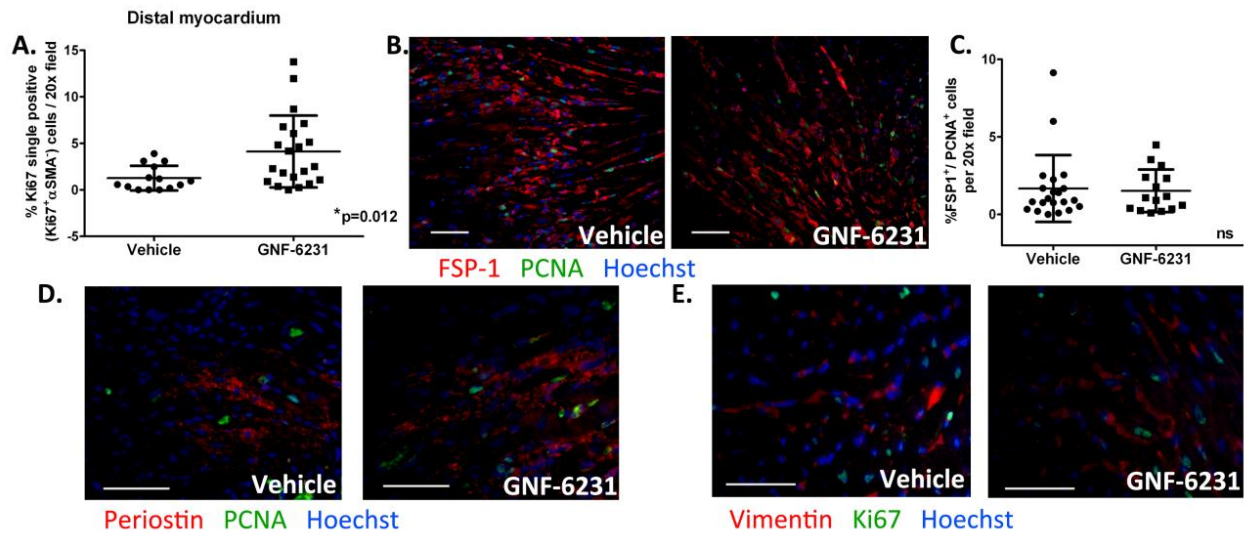

**Supplementary Figure 5: Wnt inhibition augments proliferation of Alpha SMA negative cells in the distal myocardium, but does not affect proliferation of other fibroblast subtypes.** (A) Quantification of Ki67<sup>+</sup>αSMA<sup>-</sup> cells in the distal myocardium showing higher proportion of proliferating αSMA negative cells in GNF6231-treated hearts.  $N \geq 14$  obtained from at least 4 sections imaged from  $N \geq 3$  mice per group; \* $P=0.0120$ ; Unpaired t-test. (B) Co-immunostaining for PCNA and fibroblasts marker FSP-1; quantification is presented in (C) showing no difference in percent double positive (FSP-1<sup>+</sup>PCNA<sup>+</sup>) cells between GNF-6231 and vehicle treated hearts.  $N \geq 15$  obtained from at least 5 sections imaged from  $N \geq 3$  mice per group; Mann-Whitney test. Representative co-immunostaining for (D) PCNA and Periostin, and (E) Ki67 and Vimentin; no significant difference in percent double stained cells between GNF-6231 and vehicle-treated sections were observed for both Periostin and Vimentin. Scale bars in B, D and E equal 50 μm.

## Supplementary Figure 6.

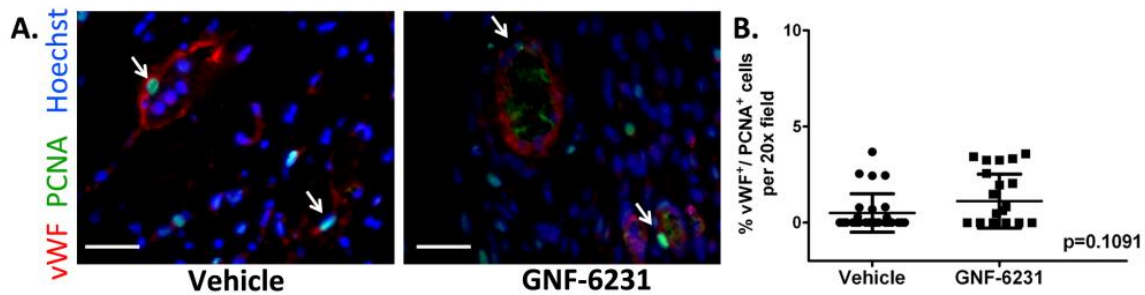

**Supplementary Figure 6: GNF-6231 treatment does not affect proliferation of vWF<sup>+</sup> endothelial cells in the infarcted heart.** (A) Representative vWF (red) and PCNA (green) immunostained sections of LV treated with GNF-6231 or vehicle. Sections were counterstained with Hoechst (blue); white arrows mark double stained cells. Scale bars equal 50 $\mu$ m. (B) Quantification of vWF and PCNA double positive cells showed no significant difference in percent double positive cells between vehicle and GNF-6231-treated hearts.  $N \geq 20$  obtained from at least 4 sections imaged from  $N \geq 5$  mice per group;  $P=0.1091$ ; Mann-Whitney test.

## Supplementary Figure 7.

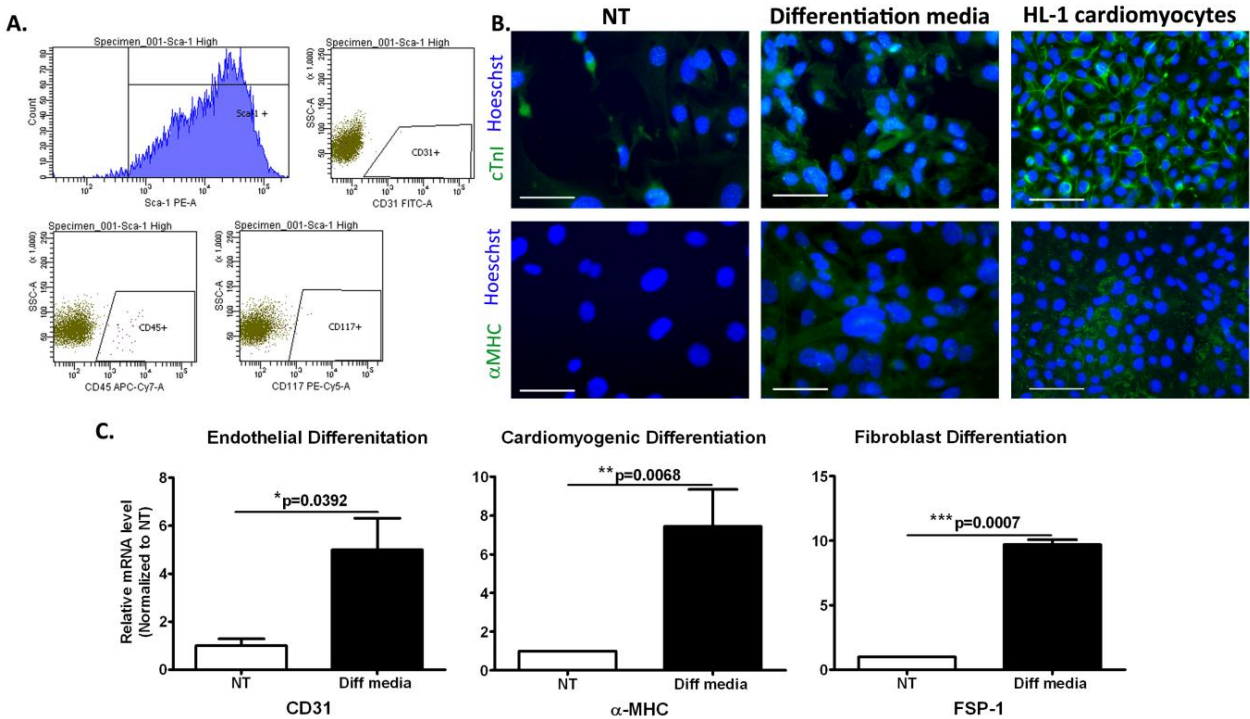

**Supplementary Figure 7: Conditionally immortalized mouse heart-derived Sca1<sup>+</sup> cells are negative for CD31, CD45 and c-kit expression, and can upregulate myocyte, endothelial and stromal markers in specific culture conditions.** (A) FACS of Sca1<sup>+</sup>CD31<sup>-</sup>CD45<sup>-</sup>CD117<sup>-</sup> cardiac progenitor cells. (B) Images showing immunostaining for αMHC and cTnI of Sca1<sup>+</sup> cells (untreated, left panels), cultured in cardiomyocyte differentiation media (middle panels) or HL-1 cardiomyocytes as control (right panel) demonstrated that conditionally immortalized murine Sca1<sup>+</sup> cells retain capacity to express cardiomyocyte markers in culture. Scale bars equal 50 μm. (C) Relative gene expression of CD31 (left chart), αMHC (middle chart) and FSP-1 (right chart) in untreated Sca1<sup>+</sup> cells and following culture in endothelial cell-, cardiomyocyte-, and fibroblast-specific differentiation media, respectively to demonstrate their multilineage potential.  $N \geq 3$  replicates from independent experiments; \* $P=0.0392$ , \*\* $P=0.0068$ , and \*\*\* $P=0.0007$ ; Mann-Whitney test.

**Table S1. List of q-RT-PCR primers**

| <b>Gene</b>     | <b>Forward</b>        | <b>Reverse</b>        |
|-----------------|-----------------------|-----------------------|
| Axin2           | GGACAGTAGCGTAGATGGAG  | CGGAAAATGAGGTAGAGACA  |
| Col1 $\alpha$ 1 | GCCAGATGGGTCCCCGAGGT  | GGGGGTCCAGCAGCACCAAC  |
| CD31            | GTGAAGGTGCATGGCGTATC  | CACAAAGTTCTCGTTGGAGGT |
| $\alpha$ MHC    | CCACTGTGGTGCCTCGTTC   | GCGTCCGTCATTCTGTCACTC |
| FSP1            | CGGTTACCATGGCAAGACCC  | TGTGCGAAGCCAGAGTAAG   |
| 18S             | CGCCGCTAGAGGTGAAATTCT | GAACCTCCGACTTTCGTTCT  |
